# Supplementary material for: A chitosan–α-naphthaldehyde hydrogel film containing pineapple leaf fibers for wound dressing applications
Source: Royal Society of Chemistry journal article supplement (doi:10.1039/d4tb01318b), 2024-01-01
Supplement: d4tb01318b1.pdf [file d4tb01318b1.pdf]

**Supporting Information**

**Chitosan- $\alpha$ -Naphthaldehyde Hydrogel Film containing Pineapple Leaf Fiber for Wound Dressing Application**

Amarjyoti Mondal<sup>a</sup>, Dasuklang Lyngdoh Nongbri<sup>b</sup>, Kusumita Achariya<sup>c</sup>, Mahabul Haque<sup>a</sup>,  
Kripmoy Aguan<sup>b</sup>, Arijit Bhattacharya<sup>c</sup>, Atanu Singha Roy<sup>a,\*</sup>

<sup>a</sup> Department of Chemical and Biological Sciences, National Institute of Technology  
Meghalaya, Shillong-793003, India

<sup>b</sup> Department of Biotechnology & Bioinformatics, North-Eastern Hill University, Shillong  
793022, India

<sup>c</sup> Department of Microbiology, School of Life Science and Biotechnology, Adamas  
University, Kolkata-700126, India

***\*Corresponding Author:*** Atanu Singha Roy

Tel.: +91 364 2501294

Fax: +91 364 2501113

Email: singharoyatanu@gmail.com; [asroy86@nitm.ac.in](mailto:asroy86@nitm.ac.in)

## Experimental Section

### **1.1 Powder X-ray diffraction (PXRD)**

The Powder X-ray diffraction (PXRD) pattern of the sample was recorded using an X-ray diffractometer (Rigaku Smartlab SE, Rigaku Corporation, Japan) equipped with Cu K $\alpha$  characteristic radiation (wavelength  $\lambda = 1.5406$  nm), which is operated at a voltage of 40 kV and a current of 50 mA. The data collection scanning rate was set at 2 degrees per minute, and  $2\theta$  angles covered from 5 to 50°. The crystallinity index of the chitosan and the prepared hydrogel film was calculated using the following Equation (Eqn S1).

$$\text{Crystallinity Index (CI)} = \left( \frac{\text{Area of the crystalline peak}}{\text{Area of the all peaks (crystalline + amorphous)}} \right)$$

(S1)

### **1.2 Fourier-transform infrared (FT-IR) spectroscopy study**

The FTIR spectra of chitosan,  $\alpha$ -Naphthaldehyde, and the prepared hydrogel were recorded in the range of 400  $\text{cm}^{-1}$  to 4000  $\text{cm}^{-1}$  using an FTIR spectrophotometer (PerkinElmer Spectrum Two instrument) equipped with UATR accessories (0.5  $\text{cm}^{-1}$  resolution).

### **1.3 FESEM (Field Emission Electron Microscopy)**

Using the ZEISS Gemini 360 instrument, the hydrogel film's texture and surface roughness were measured in the in-lens mode at a 5 KV acceleration voltage. Before taking the image, we coated the sample with Au-Pd coating prior to image capture.

### **1.4 SEM (Scanning Electron Microscopy)**

The surface morphology and texture of hydrogel film after the biodegradation test were taken using the SEM (JSM-6360 (JEOL)), which is accelerated from 1KV-30KV in the 1KV step. Before taking the image, we coated the sample with Au coating prior to image capture.

### **1.5 Mechanical Testing**

The tensile strength of the hydrogel film was determined using a universal testing machine (UTM) [ASTM D638]. During the measurement of tensile strength, a 1.0 KN load cell and a crosshead speed of 5 mm/min were employed.

### **1.6 Cytotoxicity studies of the PLF-hydrogel film.**

The MTT assay is known for its safety and sensitivity and is a widely used *in vitro* test to assess cell viability. This colorimetric assay measures the reduction of the tetrazolium dye MTT (3-[4,5-dimethylthiazol-2-yl]-2,5-diphenyltetrazolium bromide) into purple formazan crystals by metabolically active cells. The intensity of the resulting purple color, measured spectrophotometrically, is directly proportional to the number of viable cells. For the assay, freshly cultured HEK-293 cells were diluted in an Advanced MEM culture medium (Gibco, ThermoFisher) to a concentration of  $1 \times 10^3$  cells  $\text{mL}^{-1}$ . Then, 100  $\mu\text{L}$  of this cell suspension was added to each well of a 96-well plate in triplicate and incubated for 24 hours at  $37^\circ\text{C}$  in a 5%  $\text{CO}_2$  environment. After this initial incubation, the medium was replaced with 100  $\mu\text{L}$  of fresh DMEM (low glucose without phenol, Himedia) containing different concentrations of PLF-Hydrogel film (4,6,8 and 10  $\text{mg/mL}$ ). The cells were then incubated for an additional 24 hours under the same conditions. Following the second incubation, 10  $\mu\text{L}$  of MTT reagent was added to each well, and the plate was wrapped in aluminium foil to protect it from light. The plate was incubated for another 4 hours. To dissolve the formazan crystals, 100  $\mu\text{L}$  of solubilization solution was added to each well, and the plate was shaken for 30 minutes. The absorbance at 570 nm was measured using a 96-well plate reader (Synergy H1 Hybrid reader, BioTek). Cell viability was then calculated based on the absorbance readings using the following formula (Eqn S2).

$$\% \text{ Cell viability} = \frac{\text{Absorbance of the treated cell (with PLF - Hydrogel film)}}{\text{Absorbance of the control}}$$

(S2)

An automated inverted research microscope (Leica DMI4000 B) was used to take the images.



## Supplementary Figures and Tables

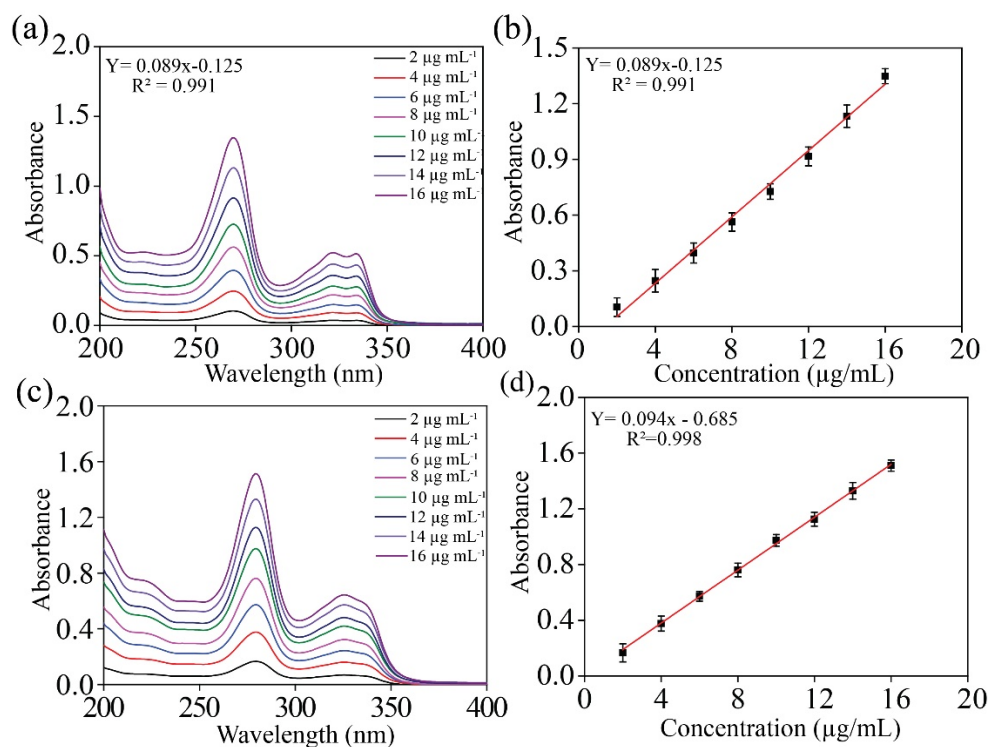

**Figure S1.** UV-Vis spectra of (a) lomefloxacin at 280 nm and (b) calibration curve of lomefloxacin, (c) UV-Vis spectra of ciprofloxacin at 270 nm and (d) calibration curve of ciprofloxacin.

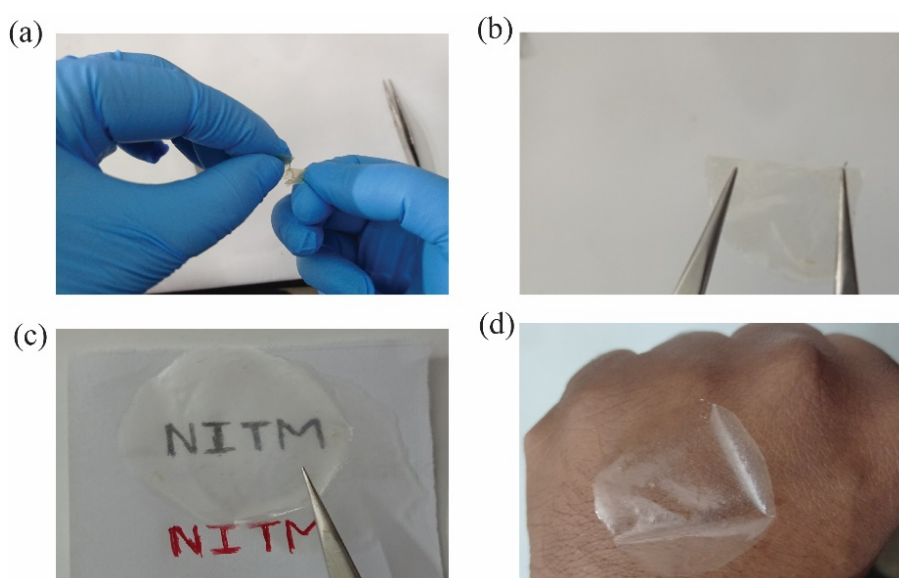

**Figure S2.** (a) Bending, (b) stretching with forceps, and (d and e) visual inspection of the NITM and skin through the hydrogel film.

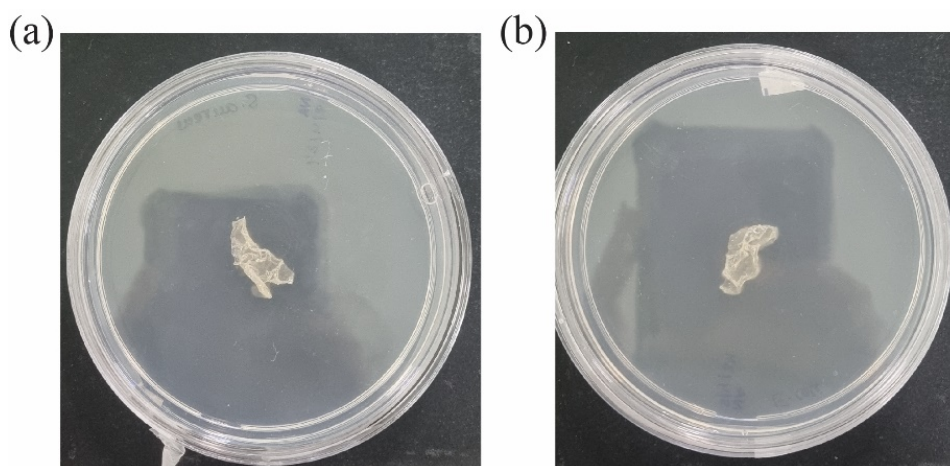

**Figure S3.** Digital photograph of the microbe penetration test of the hydrogel film in (a) *E. coli* (b) *S. aureus* bacterial strains for 5 days.

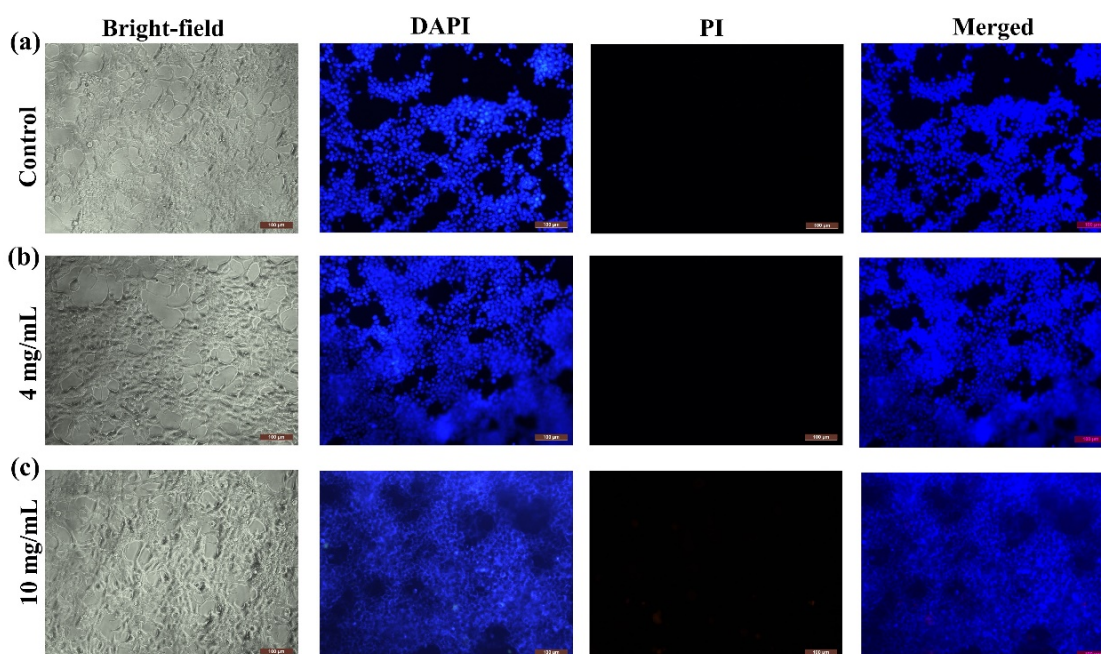

**Figure S4.** Fluorescence microscope (Leica DMI4000 B) images of (a) untreated HEK 293 cells (control), (b) 4 mg/mL, and (c) 10 mg/mL treated HEK 293 cells with PLF-Hydrogel films (scale bar 100  $\mu$ m).

**Table S1:** The most significant peaks of the hydrogel from FT-IR

| Sample   | $\nu_{C-N}$ | $\nu_{C=N}$<br>(imine) | $\nu_{\text{(bridge C-O-C)}}$ | $\nu_{C=C}$ (aromatic) | $\nu_{C-H}$ (aromatic) |
|----------|-------------|------------------------|-------------------------------|------------------------|------------------------|
| Aldehyde | absent      | absent                 | absent                        | absent                 | absent                 |
| Chitosan | 1417        | absent                 | 1150                          | absent                 | absent                 |
| Hydrogel | 1049        | 1647                   | 1046                          | absent                 | 728                    |

**Table S2:** PXRD data of Cs (Chitosan) and the hydrogel film.

| Sample    | $2\theta$       | Crystallinity index (%) |
|-----------|-----------------|-------------------------|
| Chitosan  | 10.52 and 19.93 | 97.10                   |
| Hydrofilm | 22.30           | 66.25                   |

**Table S3:** Different kinetics parameters of the release of ciprofloxacin from the gel network.

| Drug release systems | Korsmeyer and Peppas power law |       | Zero order $R^2$ | Pseudo-first order $R^2$ | Higuchi square root law $R^2$ |
|----------------------|--------------------------------|-------|------------------|--------------------------|-------------------------------|
|                      | $n$                            | $R^2$ |                  |                          |                               |
| Hydrogel             |                                |       | 0.962            | 0.950                    | 0.950                         |
| Film                 | 0.857                          | 0.984 |                  |                          |                               |

**Table S4:** Different kinetics parameters of the release of lomefloxacin from the gel network.

| Drug release systems | Korsmeyer and Peppas power law |       | Zero order $R^2$ | Pseudo-first order $R^2$ | Higuchi square root law $R^2$ |
|----------------------|--------------------------------|-------|------------------|--------------------------|-------------------------------|
|                      | $n$                            | $R^2$ |                  |                          |                               |
| Hydrogel             |                                |       | 0.989            | 0.943                    | 0.960                         |
| Film                 | 0.828                          | 0.943 |                  |                          |                               |

**Table S5.** Comparison of the application of different types of chitosan-based hydrogel with their applications.

| Hydrogel name                               | Primary materials                                                                                                           | Crosslinking method   | Application                                                          | References |
|---------------------------------------------|-----------------------------------------------------------------------------------------------------------------------------|-----------------------|----------------------------------------------------------------------|------------|
| Cat-CH/ Hydrogel                            | Sodium bicarbonate, chitosan, EDC                                                                                           | physical crosslinking | Injectable Adhesion Carriers                                         | 2          |
| OS Chitosanbased Hydrogel                   | Chitosan, tapioca starch, sodium periodate                                                                                  | Physical crosslinking | Drug delivery vehicles                                               | 3          |
| SG/CS Hydrogel                              | Succinoglycan (SG), chitosan, 5-fluorouracil                                                                                | Physical crosslinking | Ph Responds to Changes in Drug Delivery Systems                      | 4          |
| Dual-crosslinked CMC-ALG hydrogels          | Carboxymethyl chitosan, alginate, calcium chloride, EGF powder                                                              | Physical crosslinking | Clinical Wound Care Wound Aids                                       | 5          |
| TEPA – COS hydrogel                         | Tetraacetylenediamine (TEPA), epichlorohydrin (ECH), low chitosan                                                           | Physical crosslinking | As flexible sensors, wearable devices, and energy harvesting devices | 6          |
| (Fe <sup>3+</sup> -PCS/CSfHNTs NC hydrogel) | Acrylamide (AAm), acrylic acid (AAc), ammonium persulfate (APS), kaolin nanotubes (HNTs), hyperbranched polysiloxane (HSiv) | Physical crosslinking | For load-bearing structural materials                                | 7          |
| CS-TPP-hydrogel                             | Chitosan, tripolyphosphate (TPP), SQR22 dye, dimethyl sulfoxide (DMSO)                                                      | Physical crosslinking | Drug delivery                                                        | 8          |
| Chitosan Hydrogel modified cotton fabrics   | Chitosan polymer, amylase, sodium bisulfite (Na <sub>2</sub> S <sub>2</sub> O <sub>4</sub> ),                               | Physical crosslinking | Significant antimicrobial activity, pH sensitivity, good mechanical  |            |

|                                                                  | monochloroacetic acid (CAA), sodium carbonate (Na <sub>2</sub> CO <sub>3</sub> ), reactive dye (Supra rouge SPX) |                                                                 | properties                                                                                                                                                                              | 9                   |
|------------------------------------------------------------------|------------------------------------------------------------------------------------------------------------------|-----------------------------------------------------------------|-----------------------------------------------------------------------------------------------------------------------------------------------------------------------------------------|---------------------|
| <b>Chitosan-<math>\alpha</math>-Naphthaldehyde Hydrogel film</b> | Chitosan, $\alpha$ -Naphthaldehyde                                                                               | Physical Crosslinking (Covalent Crosslinking)                   | pH-responsive swelling behavior, Antibiotics delivery, High Encapsulation Efficiency, Water Vapour Transmission Rate (WVTR), Drug release kinetics, Microbe Penetration, Biodegradation | <b>Present Work</b> |
| <b>PLF-Hydrogel film</b>                                         | Chitosan, $\alpha$ -Naphthaldehyde, and PLF                                                                      | Physical Crosslinking (Covalent Crosslinking) infusion with PLF | pH-responsive swelling behavior, High mechanical strength, Retain its mechanical strength after swelling, Cell viability (against HEK-293), Antibacterial activity                      | <b>Present Work</b> |

## References.

- 2 C. Guyot, M. Cerruti and S. Lerouge, *Mater. Sci. Eng. C*, 2021, **118**, 111529.
- 3 D. Sarmah, M. A. Rather, A. Sarkar, M. Mandal, K. Sankaranarayanan and N. Karak, *Int. J. Biol. Macromol.*, 2023, **237**, 124206.
- 4 J. Kim, Y. Kim, J. Jeong, J.-M. Kim, M. S. Kim and S. Jung, *Int. J. Biol. Macromol.*, 2023, **242**, 124888.
- 5 Y. Hu, Z. Zhang, Y. Li, X. Ding, D. Li, C. Shen, F.-J. Xu, *Macromol. Rapid Commun.*, 2018, **39**, e1800069.
- 6 F. Hong, P. Qiu, Y. Wang, P. Ren, J. Liu, J. Zhao and D. Gou, *Food Chem. X*, 2024, **21**, 101095.
- 7 S. N. Li, B. Li, Z. R. Yu, Y. Li, K. Y. Guo, L. X. Gong, Y. Feng, D. Jia, Y. Zhou and L. C. Tang, *Compos. Part B Eng.*, 2020, **194**, 108046.
- 8 J. H. Lim, D. Kai, C. Lee, *New J. Chem.*, 2023, **47**, 550-553
- 9 M. Trad, W. Miled, S. Benltoufa, A. Boughattas, R. Benslama, F. Fayala and A. Bakhrouf, *J. Appl. Polym. Sci.*, 2018, **135**, 46645.
